# Supplementary material for: Formulation and Efficacy of Catalase-Loaded Nanoparticles for the Treatment of Neonatal Hypoxic-Ischemic Encephalopathy
Source: MDPI journal article supplement (doi:10.3390/pharmaceutics13081131), 2021-07-23
Supplement: s1 [file s1]

# Supplementary Materials: Formulation and Efficacy of Catalase-Loaded Nanoparticles for the Treatment of Neonatal Hypoxic-Ischemic Encephalopathy

Andrea Joseph <sup>1</sup>, Chris W. Nyambura <sup>1</sup>, Danielle Bondurant <sup>1</sup>, Kylie Corry <sup>2</sup>, Denise Beebout <sup>1</sup>, Thomas R. Wood <sup>2</sup>, Jim Pfaendtner <sup>1</sup> and Elizabeth Nance <sup>1,\*</sup>

**Table S1.** Amino Acid categories for residues with >95% occupancy.

| Amino Acid Grouping | Residue (Label)                  |
|---------------------|----------------------------------|
| Negative            | Aspartic Acid (ASP)              |
|                     | Glutamic Acid (GLU)              |
| Positive            | Lysine (LYS)                     |
|                     | Arginine (ARG)                   |
|                     | Fully Protonated Histidine (HIP) |
|                     | Asparagine (ASN)                 |
|                     | Cysteine (CYS)                   |
|                     | SS-bonded Cysteine (CYX)         |
|                     | Protonated Glutamic Acid (GLH)   |
| Polar               | Protonated Aspartic Acid (ASH)   |
|                     | Glutamine (GLN)                  |
|                     | Threonine (THR)                  |
|                     | Serine (SER)                     |
|                     | Glycine (GLY)                    |
|                     | Histidine (HIS or HIE or HID)    |
|                     | Alanine (ALA)                    |
|                     | Isoleucine (ILE)                 |
|                     | Leucine (LEU)                    |
|                     | Valine (VAL)                     |
| Hydrophobic         | Proline (PRO)                    |
|                     | Phenylalanine (PHE)              |
|                     | Tryptophan (TRP)                 |
|                     | Methionine (MET)                 |
|                     | Tyrosine (TYR)                   |
|                     | Phenylalanine (PHE)              |
|                     | Tryptophan (TRP)                 |
| Aromatic            | Tyrosine (TYR)                   |
|                     | Histidine (HIS or HID or HIE)    |

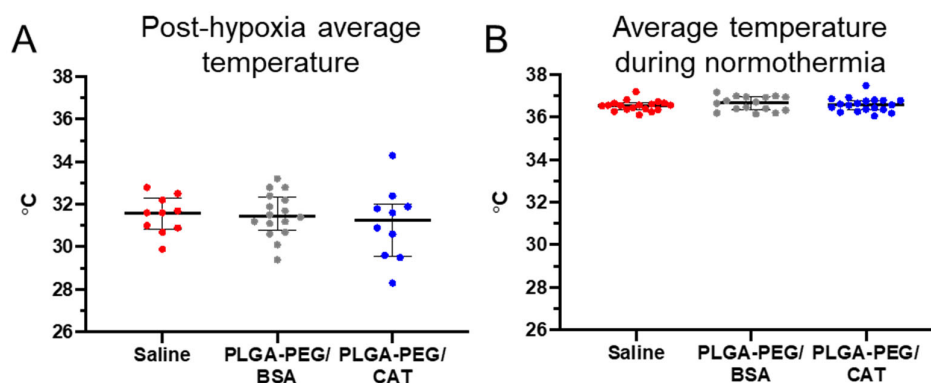

**Figure S1.** Rectal temperature of P10 rats (**A**) immediately after hypothermia and (**B**) during normothermia.

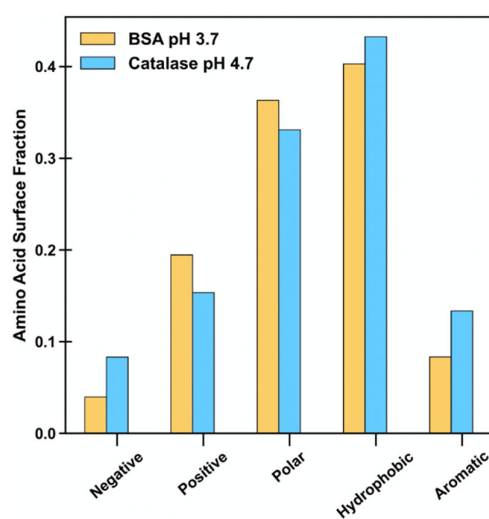

**Figure S2.** Surface amino acid composition of BSA at pH 3.7 in its native state, compared to catalase at pH 4.7.

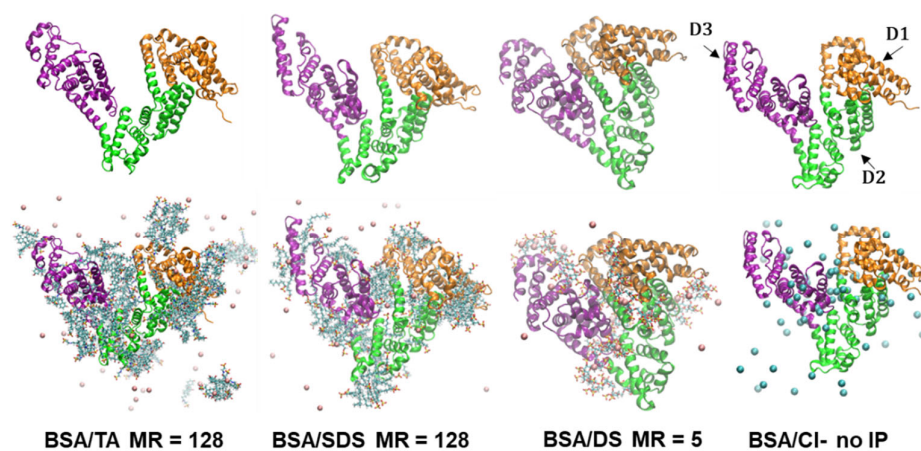

**Figure S3.** End of trajectory snapshots ( $t = 200$  ns) of BSA without (top row) and with (bottom row) ion-pairing agents and neutralizing ions. Chlorine ions are represented by cyan particles and potassium ions are represented by brown particles. Domain I (D1) is in orange, Domain II (D2) is in green and Domain III (D3) is in purple.

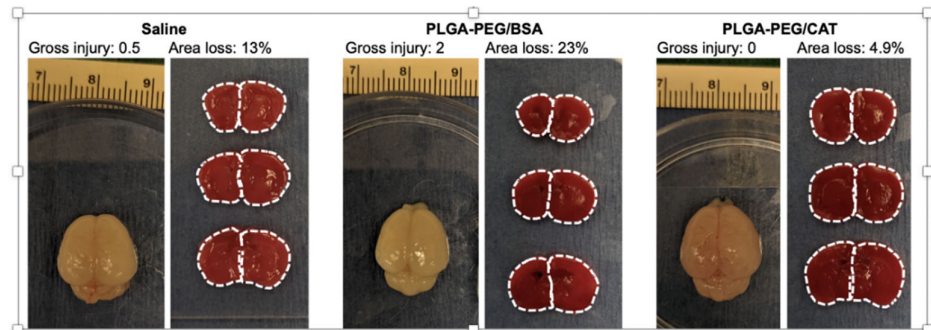

**Figure S4.** Representative gross injury and area loss images from each group. In the saline and PLGA-PEG/BSA groups, the left hemisphere (left side of each slice) is noticeably smaller than the right hemisphere.
